# Supplementary material for: Interspecies diversity of chloride channel regulators, calcium-activated 3 genes
Source: PubMed Central journal article supplement (PMC5773202; doi:10.1371/journal.pone.0191512), 2018-01-18
Supplement: pone.0191512.s001.pdf [file pone.0191512.s001.pdf]

S1 Table: Nomenclature of duplicated *CLCA3* genes in different species

| Species | Nomenclature used in this report | Nomenclature according to the Genbank database | Genbank accession number | Previously used names and references      |
|---------|----------------------------------|------------------------------------------------|--------------------------|-------------------------------------------|
| cattle  | <i>CLCA3</i> or (3)              | <i>CLCA3</i>                                   | NM_181018                | <i>Lu-ECAM-1</i> [1]<br><i>bCLCA2</i> [2] |
|         | <i>CLCAx</i> or (x)              | <i>LOC784768</i>                               | NM_001242583             | <i>CaCC</i> [3]<br><i>bCLCA1</i> [2]      |
| sheep   | <i>CLCA3</i> or (3)              | <i>LOC101116002</i>                            | XM_004002159             | -                                         |
|         | <i>CLCAx</i> or (x)              | <i>LOC101116267</i>                            | XM_012134623             | -                                         |
| mouse   | <i>CLCA3a1</i> or (3a1)          | <i>Clca3a1</i>                                 | XM_006500968             | <i>mCLCA1</i> [2]<br><i>mCaCC</i> [4]     |
|         | <i>CLCA3a2</i> or (3a2)          | <i>Clca3a2</i>                                 | XM_006502346             | <i>mCLCA2</i> [5]                         |
|         | <i>CLCA3b</i> or (3b)            | <i>Clca3b</i>                                  | NM_139148                | <i>mCLCA4</i> [6]                         |
| rat     | <i>CLCA4l</i> or (4l)            | <i>Clca4l</i>                                  | NM_001077356             | -                                         |
|         | <i>CLCA2</i> or (2)              | <i>Clca2</i>                                   | NM_001013202             | -                                         |

1. Elble RC, Widom J, Gruber AD, Abdel-Ghany M, Levine R, Goodwin A, et al. Cloning and characterization of lung-endothelial cell adhesion molecule-1 suggest it is an endothelial chloride channel. *J Biol Chem.* 1997;272(44):27853-61. PubMed PMID: 9346932.
2. Gruber AD, Fuller CM, Elble RC, Benos DJ, Pauli BU. The CLCA gene family: a novel family of putative chloride channels. *Current Genomics.* 2000;1(2):201-22.
3. Cunningham SA, Awaysda MS, Bubien JK, Ismailov, II, Arrate MP, Berdiev BK, et al. Cloning of an epithelial chloride channel from bovine trachea. *J Biol Chem.* 1995;270(52):31016-26. PubMed PMID: 8537359.
4. Gandhi R, Elble RC, Gruber AD, Schreur KD, Ji HL, Fuller CM, et al. Molecular and functional characterization of a calcium-sensitive chloride channel from mouse lung. *J Biol Chem.* 1998;273(48):32096-101. PubMed PMID: 9822685.
5. Lee D, Ha S, Kho Y, Kim J, Cho K, Baik M, et al. Induction of mouse Ca(2+)-sensitive chloride channel 2 gene during involution of mammary gland. *Biochem Biophys Res Commun.* 1999;264(3):933-7. doi: 10.1006/bbrc.1999.1583. PubMed PMID: 10544033.
6. Elble RC, Ji G, Nehrke K, DeBiasio J, Kingsley PD, Kotlikoff MI, et al. Molecular and functional characterization of a murine calcium-activated chloride channel expressed in smooth muscle. *J Biol Chem.* 2002;277(21):18586-91. doi: 10.1074/jbc.M200829200. PubMed PMID: 11896056.
